# Supplementary material
Source: MDPI journal article supplement (https://www.mdpi.com/2071-1050/12/21/9303)
Supplement: s1 [file s1]

## Supplementary Material

Table S1. Soil characteristics: soil organic carbon (SOC), pH, particle size distribution (clay, silt and sand) of Lou and loessial soil from the Loess Plateau.

|               | SOC (g kg <sup>-1</sup> ) | pH         | Clay (%)   | Silt (%)   | Sand (%)  |
|---------------|---------------------------|------------|------------|------------|-----------|
| Lou soil      | 5.3 ± 0.2                 | 8.4 ± 0.02 | 30.5 ± 0.5 | 62.5 ± 0.6 | 7.1 ± 0.1 |
| loessial soil | 8.6 ± 0.2                 | 8.0 ± 0.1  | 27.7 ± 0.2 | 62.5 ± 0.4 | 9.9 ± 0.4 |
